# Supplementary material for: Longitudinal fundus imaging and its genome-wide association analysis provide evidence for a human retinal aging clock
Source: eLife journal article supplement (doi:10.7554/elife.82364), 2023-03-23
Supplement: supp [file elife-82364-supp-v1.zip]

## Sheet: Sheet1
Outcome	Num observations	Beta [95% CI]	P-value
Fluid intelligence	53262	0.044 [0.036-0.052]	5.34244e-27
Systolic blood pressure	55064	0.021 [0.013-0.029]	1.0248e-07
Health score (England)*	54180	-0.018 [-0.027--0.010]	2.25617e-05
Pulse wave arterial stiffness	54687	0.010 [0.002-0.018]	0.0168516
Overall health rating	54919	0.013 [-0.006-0.033]	0.177312
Diastolic blood pressure	55064	0.005 [-0.003-0.013]	0.242233
Longstanding illness	53799	-0.010 [-0.052-0.033]	0.653284
