# Supplementary material for: Longitudinal fundus imaging and its genome-wide association analysis provide evidence for a human retinal aging clock
Source: eLife journal article supplement (doi:10.7554/elife.82364), 2023-03-23
Supplement: supp [file elife_poa_e82364_Supplementary_file_3.xls]

## Sheet: Sheet1
Outcome	Num observations	Num events	P-value	Hazard ratio [95% CI]
COPD	54365	717	0.004833	1.029 [1.009-1.049]
Myocardial infarction	54206	654	0.048656	1.021 [1.000-1.042]
Asthma	48839	656	0.123855	1.016 [0.996-1.037]
Stroke	54522	410	0.588609	1.007 [0.981-1.034]
Parkinsonism	55176	106	0.631987	1.013 [0.962-1.066]
Dementia	55244	164	0.978826	1.001 [0.959-1.044]
