# Supplementary material for: Longitudinal fundus imaging and its genome-wide association analysis provide evidence for a human retinal aging clock
Source: eLife journal article supplement (doi:10.7554/elife.82364), 2023-03-23
Supplement: supp [file elife_poa_e82364_Supplementary_file_5.xlsx]

## Sheet: Sheet1
Model	Beta	P-value	Pearson ⍴
VA ~ Age	0.0046	0	0.218
VA ~ eyeAge	0.0052	0	0.221
VA_eyeage_residual ~ Age	0.0007	1.6x10-13	0.032
