# Supplementary material for: Longitudinal fundus imaging and its genome-wide association analysis provide evidence for a human retinal aging clock
Source: eLife journal article supplement (doi:10.7554/elife.82364), 2023-03-23
Supplement: supp [file elife_poa_e82364_Supplementary_file_6.docx]

This tsv file is about 500MB and I was not able to upload to the system.

Please use the link below to access the file:

https://www.dropbox.com/s/jf5ukq4dmlecbe3/Supplemental%20Table%201.tsv.gz?dl=0
